# Supplementary material
Source: PubMed Central journal article supplement (PMC8686688)
Supplement: NIHMS1760467-supplement-Supplemental_Material.pdf [file NIHMS1760467-supplement-Supplemental_Material.pdf]

# Supplementary information for "Four distinct trajectories of tau deposition identified in Alzheimer's disease"

**Jacob W. Vogel<sup>1</sup>, Alexandra L. Young<sup>2</sup>, Neil P. Oxtoby<sup>3,4</sup>, Ruben Smith<sup>5,6</sup>, Rik Ossenkoppele<sup>5,6,7</sup>, Olof T. Strandberg<sup>5,6</sup>, Renaud La Joie<sup>8</sup>, Leon M. Aksamian<sup>3,9</sup>, Michel J Grothe<sup>10,11</sup>, Yasser Iturria-Medina<sup>1</sup>, the Alzheimer's Disease Neuroimaging Initiative<sup>\*</sup>, Michael J. Pontecorvo<sup>12</sup>, Michael D. Devous<sup>12</sup>, Gil D. Rabinovici<sup>8,13</sup>, Daniel C. Alexander<sup>3,4</sup>, Chul Hyung Lyoo<sup>14</sup>, Alan C. Evans<sup>1</sup>, and Oskar Hansson<sup>3,4</sup>**

<sup>1</sup>Montreal Neurological Institute, McGill University, Montréal, QC, Canada

<sup>2</sup>Department of Neuroimaging, Institute of Psychiatry, Psychology and Neuroscience, King's College London, London, UK.

<sup>3</sup>Centre for Medical Image Computing, University College London, London, WC1E 6BT, UK

<sup>4</sup>Department of Computer Science, University College London, London, WC1E 6BT, UK

<sup>5</sup>Clinical Memory Research Unit, Lund University, Lund, Sweden

<sup>6</sup>Memory Clinic, Skåne University Hospital, Lund, Sweden

<sup>7</sup>Alzheimer Center Amsterdam, Department of Neurology, Amsterdam Neuroscience, Vrije Universiteit Amsterdam, Amsterdam UMC, Amsterdam, The Netherlands

<sup>8</sup>Memory and Aging Center, Department of Neurology, Weill Institute for Neurosciences, University of California, San Francisco, San Francisco, CA

<sup>9</sup>Department of Medical Physics and Biomedical Engineering, University College London, London, WC1E 6BT, UK

<sup>10</sup>German Center for Neurodegenerative Diseases (DZNE), Rostock, Germany

<sup>11</sup>Instituto de Biomedicina de Sevilla, Hospital Universitario Virgen del Rocío/CSIC/Universidad de Sevilla, Seville, Spain

<sup>12</sup>Avid Radiopharmaceuticals, Philadelphia, PA, USA

<sup>13</sup>Department of Radiology and Biomedical Imaging; University of California, San Francisco, San Francisco, CA

<sup>14</sup>Departments of Neurology, Gangnam Severance Hospital, Yonsei University College of Medicine, Seoul, Republic of Korea

<sup>\*</sup>Data used in preparation of this article were obtained from the Alzheimer's Disease Neuroimaging Initiative (ADNI) database ([adni.loni.usc.edu](http://adni.loni.usc.edu)). As such, the investigators within the ADNI contributed to the design and implementation of ADNI and/or provided data but did not participate in analysis or writing of this report. A complete listing of ADNI investigators can be found at:

[http://adni.loni.usc.edu/wp-content/uploads/how\\_to\\_apply/ADNI\\_Acknowledgement\\_List.pdf](http://adni.loni.usc.edu/wp-content/uploads/how_to_apply/ADNI_Acknowledgement_List.pdf)

## Supplementary Notes

**Supplementary Note 1:** Once SuStaIn had assigned individuals into subtypes, these subtypes were further subjected to post-hoc visual inspection and analysis to identify, characterize and remove potential "false-positives". A large minority of the S2 (MTL-Sparing) subtype were systematically identified as likely outliers, and were converted to S0 individuals (see Methods: Post-hoc subtype correction, Supplementary Fig S2a-c). After this process, the S0 (tau-negative) class included 78.5% of all cognitively normal individuals, 36.3% of individuals with MCI, and 4.7% of individuals with AD dementia. Altogether, the S0 group was composed of 85.9% cognitively normal individuals, 12.5% (A+) MCI patients and 1.5% (A+) AD patients.

**Supplementary Note 2:** In the replication analysis in BioFII, a subtype emerged similar to the S4 (L Temporal) subtype in the discovery sample, but with right- rather than left-lateralized pattern. Two possible differences between the discovery and replication datasets that could lead to this discrepancy are the employed tau-PET radiotracer and sample size. To rule out the latter, we split the discovery sample in half ( $n=571$ ,  $572$ ) and reran SuStaIn on each half, constraining the model to four subtypes. While the first three subtypes were once again very similar, a discrepancy was observed once again in the L Temporal phenotype. One half demonstrated a left lateralized phenotype, while the other half resulted in a right lateralized phenotype similar to the replication sample (Supplementary Fig S7). These results suggest a consistent overall pattern for the S4: L Temporal phenotype, but that this phenotype has a high propensity for marked lateralization. The emergence of a more left-predominant or right-predominant phenotype in data-driven analyses such as this one may vary due to sample size and composition. The variation in lateralization affected the overall stability of S4 and, to a lesser degree, S1, but S2 and S3 were remarkably stable over the four datasets (original, split 1, split 2, replication; Supplementary Fig S7).

**Supplementary Note 3:** We investigate the longitudinal progression of SuStaIn stage. Starting originally with the 519 individuals with longitudinal flortaucipir-PET data, we excluded subtype 0 individuals ( $n=330$ ), and also excluded individuals that were not classified as the same subtype across all measurements ( $n=36$ ), for a final sample of  $n=153$ . Across the whole sample, we observed significant yearly increase in SuStaIn stage (mean /year = 0.8,  $t[148]=6.54$ ,  $p<0.0001$ ). This relationship was consistent across subtype, though only a trend for S2 (MTL-Sparing) (Fig 3h; S1: mean = 0.78,  $t[57]=4.09$ ,  $p=0.0001$ ; S2: mean = 0.45,  $t[39]=1.81$ ,  $p=0.079$ ; S3: mean = 0.64,  $t[31]=2.61$ ,  $p=0.014$ , S4: mean = 1.73,  $t[21]=5.85$ ,  $p<0.0001$ ). A significant difference in mean annual rate of SuStaIn stage change was seen across subtypes ( $F=3.80$ ,  $p=0.012$ ), and posthoc tests revealed annual SuStaIn stage increased faster in S4 (L Temporal) compared to S2 (MTL-Sparing) and S3 (Posterior) subtypes. Supplementary Table S3 shows the proportion of individuals who progressed, remained stable, or regressed in SuStaIn stage at their second visit, before and after accounting for model uncertainty. Notably, no S4 individuals regressed.

## Supplementary Tables

|                      | Discovery               |                           |                         |                           |                          |              | Validation            |
|----------------------|-------------------------|---------------------------|-------------------------|---------------------------|--------------------------|--------------|-----------------------|
|                      | ADNI                    | BioF                      | UCSF                    | Seoul                     | AVID                     | Total*       | BF2                   |
| <b>N</b>             | 486                     | 144                       | 84                      | 188                       | 241                      | 1143         | 467                   |
| <b>Age</b>           | 74.4 (7.4) <i>c,d</i>   | 72.4 (8.1) <i>c,d</i>     | 63.4 (8.7) <i>f</i>     | 69.2 (9.8) <i>f</i>       | 72.7 (9.1) <i>c,d</i>    | 72.1 (8.9)   | 69.0 (10.1) <i>g</i>  |
| <b>Prop. Female</b>  | 0.56                    | 0.47 <i>d</i>             | 0.52                    | 0.66 <i>b,e</i>           | 0.49 <i>d</i>            | 0.55         | 0.5                   |
| <b>Education</b>     | 16.6 (2.5) <i>b,d,e</i> | 12.2 (3.6) <i>a,c,e</i>   | 17.0 (2.9) <i>b,d,e</i> | 11.5 (4.9) <i>a,c,e</i>   | 15.4 (2.7) <i>f</i>      | 14.9 (3.8)   | 12.4 (3.9) <i>g</i>   |
| <b>Prop. CN</b>      | 0.84 <i>f</i>           | 0.46 <i>a,c,e</i>         | 0.05 <i>f</i>           | 0.48 <i>a,c,e</i>         | 0.58 <i>f</i>            | 0.62         | 0.4 <i>g</i>          |
| <b>Prop. MCI</b>     | 0.16 <i>e</i>           | 0.19                      | 0.18                    | 0.23                      | 0.25                     | 0.2          | 0.25 <i>g</i>         |
| <b>Prop. AD</b>      | 0.01 <i>f</i>           | 0.35 <i>a,c,e</i>         | 0.77 <i>f</i>           | 0.29 <i>a,c,e</i>         | 0.17 <i>f</i>            | 0.19         | 0.16                  |
| <b>Prop. Aβ+</b>     | 0.58 <i>b,c</i>         | 0.8 <i>f</i>              | 0.96 <i>f</i>           | 0.57 <i>b,c</i>           | 0.6 <i>b,c</i>           | 0.65         | 0.56 <i>g</i>         |
| <b>Prop. APOE4</b>   | 0.35 <i>b,e</i>         | 0.59 <i>a,c,d</i>         | 0.42 <i>b</i>           | 0.35 <i>b,e</i>           | 0.48 <i>a,d</i>          | 0.41         | 0.51 <i>g</i>         |
| <b>Prop. APOE4/4</b> | 0.05 <i>b</i>           | 0.18 <i>a,d,e</i>         | 0.12                    | 0.08 <i>b</i>             | 0.08 <i>b</i>            | 0.08         | 0.06                  |
| <b>MMSE</b>          | 28.63 (2.21) <i>f</i>   | 25.67 (4.77) <i>a,c,e</i> | 22.18 (5.65) <i>f</i>   | 24.75 (5.31) <i>a,c,e</i> | 27.0 (3.7) <i>f</i>      | 26.85 (4.28) | 26.32 (4.29) <i>g</i> |
| <b>Total Tau</b>     | 1.12 (0.1) <i>f</i>     | 1.27 (0.31) <i>a,c</i>    | 1.68 (0.38) <i>f</i>    | 1.28 (0.26) <i>a,c,e</i>  | 1.22 (0.25) <i>a,c,d</i> | 1.23 (0.27)  | 1.16 (0.27) <i>g</i>  |
| <b>IT Tau</b>        | 1.26 (0.2) <i>f</i>     | 1.62 (0.55) <i>f</i>      | 2.11 (0.6) <i>f</i>     | 1.43 (0.48) <i>a,b,c</i>  | 1.42 (0.43) <i>a,b,c</i> | 1.43 (0.46)  | 1.44 (0.56)           |

**Supplementary Table S1.** Sample characteristics for individuals across cohorts. Significance testing assessing inter-cohort difference performed with one-way ANOVAs for scalar variables and  $\chi^2$  tests for categorical variables. P-values assessed with Tukey's posthoc tests.

\* All variables exhibited significant inter-cohort differences.

*a* p<0.05 different from ADNI

*b* p<0.05 different from BioF

*c* p<0.05 different from UCSF

*d* p<0.05 different from Seoul

*e* p<0.05 different from AVID

*f* p<0.05 different from all other cohorts

*g* p<0.05 different from Discovery sample

Prop. = Proportion; CN = Cognitively Normal; MCI = Mild Cognitive Impairment; AD = Alzheimer's Disease; MMSE = Mini-mental State Examination; Aβ+ = -β positive; IT = Inferior temporal lobe; ADNI = Alzheimer's Disease Neuroimaging Initiative; BioF = BioFINDER Cohort; UCSF = University of California, San Francisco, Memory and Aging Center Cohort; Seoul = Gangnam Severance Hospital Cohort; AVID = Avid Radiopharmaceuticals Cohort; BF2 = BioFINDER II Cohort

| Dx  | Group 1 | Group 2 | Mean Diff | p(adj) | lower CI | upper CI |
|-----|---------|---------|-----------|--------|----------|----------|
| CN  | S1      | S2      | -0.2938   | 0.6866 | -1.0163  | 0.4287   |
|     | S1      | S3      | 0.7892    | 0.001  | 0.3      | 1.2784   |
|     | S1      | S4      | -0.1138   | 0.9    | -0.9062  | 0.6786   |
|     | S2      | S3      | 1.083     | 0.001  | 0.406    | 1.7599   |
|     | S2      | S4      | 0.18      | 0.9    | -0.7402  | 1.1003   |
|     | S3      | S4      | -0.9029   | 0.012  | -1.654   | -0.1519  |
| MCI | S1      | S2      | -0.8581   | 0.0935 | -1.8123  | 0.0961   |
|     | S1      | S3      | 0.8386    | 0.0199 | 0.0984   | 1.5788   |
|     | S1      | S4      | -1.1093   | 0.0039 | -1.9363  | -0.2823  |
|     | S2      | S3      | 1.6967    | 0.001  | 0.6539   | 2.7395   |
|     | S2      | S4      | -0.2512   | 0.9    | -1.3573  | 0.8549   |
|     | S3      | S4      | -1.9479   | 0.001  | -2.8758  | -1.0201  |
| AD  | S1      | S2      | -1.2161   | 0.0233 | -2.3112  | -0.1209  |
|     | S1      | S3      | -0.2955   | 0.8675 | -1.3321  | 0.7411   |
|     | S1      | S4      | -2.3472   | 0.001  | -3.3969  | -1.2975  |
|     | S2      | S3      | 0.9206    | 0.1921 | -0.2771  | 2.1182   |
|     | S2      | S4      | -1.1311   | 0.0755 | -2.3401  | 0.0779   |
|     | S3      | S4      | -2.0517   | 0.001  | -3.2079  | -0.8954  |

**Supplementary Table S2.** Tukey's pairwise posthoc tests showing subtype differences in longitudinal MMSE decline, stratified by clinical diagnosis. Values represent differences in predicted slopes based on the mixed models described in Results section "Cognitive prognosis of AD subtypes", and correspond directly to the boxplots in Main Text Figure 3d.

Dx = Diagnosis; CN = Cognitively Normal; MCI = Mild Cognitive Impairment; AD = probable Alzheimer's dementia; Diff = Difference; adj = adjusted.

N subjects CN: S1=22, S2=11, S3=38, S4=7

N subjects MCI: S1=45, S2=13, S3=24, S4=17

N subjects AD: S1=44, S2=22, S3=27, S4=25

| Cutoff     | N   | Perc. Total | Stability |
|------------|-----|-------------|-----------|
| None       | 191 | 100%        | 83.9      |
| <b>0.5</b> | 167 | 87%         | 86.8      |
| <b>0.6</b> | 163 | 85%         | 86.5      |
| <b>0.7</b> | 156 | 82%         | 86.8      |
| <b>0.8</b> | 149 | 75%         | 86.6      |
| <b>0.9</b> | 137 | 72%         | 88.3      |

**Supplementary Table S3.** Longitudinal stability of subtypes when only including individuals above different thresholds of subtype probability (excluding individuals classified as S0).

| Subtype          | N   | Progressed | Stable | Regressed |
|------------------|-----|------------|--------|-----------|
| All              | 153 | 53.8%      | 27.6%  | 18.6      |
| S1 (Limbic)      | 58  | 50.0%      | 36.7%  | 13.3%     |
| S2 (MTL-Sparing) | 42  | 47.6%      | 19.0%  | 33.3%     |
| S3 (Posterior)   | 32  | 57.6%      | 21.2%  | 21.2%     |
| S4 (L Temporal)  | 21  | 71.4%      | 28.6%  | 0.0%      |

| Subtype          | N   | Progressed | Stable | Regressed |
|------------------|-----|------------|--------|-----------|
| All              | 153 | 37.9%      | 51.0%  | 11.1%     |
| S1 (Limbic)      | 58  | 36.2%      | 53.4%  | 10.3%     |
| S2 (MTL-Sparing) | 42  | 33.3%      | 47.6%  | 19.0%     |
| S3 (Posterior)   | 32  | 46.9%      | 43.8%  | 9.4%      |
| S4 (L Temporal)  | 21  | 38.1%      | 61.9%  | 0.0%      |

**Supplementary Table S4.** Proportion of individuals progressing, regressing and remaining stable in SuStaIn stage, before (top) and after (bottom) accounting for model uncertainty

|         | Memory                                                                                                  | Executive                                                                                                                 | Language                                                                                           | Visuospatial                                                                             |
|---------|---------------------------------------------------------------------------------------------------------|---------------------------------------------------------------------------------------------------------------------------|----------------------------------------------------------------------------------------------------|------------------------------------------------------------------------------------------|
| 5*ADNI  | Logical Memory Total<br>Logical Memory Delayed Recall<br>RAVLT Immediate Recall<br>RAVLT Delayed Recall | DigitSpan Backward<br>DigitSpan Forward<br>Digit Symbol<br>Trails A<br>Trails B                                           | BNT Total<br>Category Fluency: Animals<br>Category Fluency: Vegetables<br>Multilingual Naming Test | Clock Draw<br>Figure Drawing                                                             |
| 4*BioF  | ADAS Delayed Recall                                                                                     | AQT Cognitive Speed<br>Letter Fluency: S<br>Trails A<br>Stroop Correct                                                    | ADAS Naming Objects<br>Category Fluency: Animals                                                   | Clock Drawing<br>Cube                                                                    |
| 5*AVID  | Clock Draw Recall<br>WMS Immediate Recall<br>WMS Delayed Recall                                         | DigitSpan Backward<br>DigitSpan Forward<br>Digit Symbol<br>Trails A<br>Trails B                                           | ANART<br>BNT Total<br>Category Fluency: Animals                                                    | Benton JoLO<br>Clock Draw Copy                                                           |
| 2*Seoul | Modified RFC Delayed Recall<br>SVLT Delay                                                               | Digit Symbol<br>Letter Fluency                                                                                            | BNT Total                                                                                          | Modified RFC                                                                             |
| 6*UCSF  | CVLT Correct Total<br>CVLT Delayed Recall<br>Modified RFC Delayed Recall                                | Abstract Reasoning Test<br>DigitSpan Backward<br>DigitSpan Forward<br>Letter Fluency<br>Modified Trails<br>Stroop Correct | BNT Total<br>Category Fluency: Animals<br>Repetition test<br>Syntax test<br>Verbal Agility test    | Dot Counting<br>Fragmented Letters<br>Modified RFC<br>Number Location<br>Object Decision |

**Supplementary Table S5.** Cohort-specific cognitive tests composing each cognitive domain score. ADAS = Alzheimer's Disease Assessment Scale; ANART = American National Adult Reading Test; AQT = A Quick Test (of); BNT = Boston Naming Test; CVLT = California Verbal Learning Test; JoLO = Judgement of Line Orientation; RAVLT = Rey Auditory Verbal Learning Test; RFC = Rey Figure Copy; SVLT = Seoul Verbal Learning Test; WMS = Wechsler Memory Scale;

| <b>Original</b>    | <b>Anchor 1</b> | <b>Anchor 2</b> | <b>Anchor 3</b> | <b>Data-Driven</b> | <b>Anchor 1</b> | <b>Anchor 2</b> | <b>Anchor 3</b> |
|--------------------|-----------------|-----------------|-----------------|--------------------|-----------------|-----------------|-----------------|
| <b>L MTL</b>       | 2.00            | 5.00            | 10.00           | <b>L MTL</b>       | 2.02            | -               | -               |
| <b>R MTL</b>       | 2.00            | 5.00            | 10.00           | <b>R MTL</b>       | 2.02            | -               | -               |
| <b>L Temporal</b>  | 2.00            | 5.00            | 10.00           | <b>L Temporal</b>  | 1.99            | 7.11            | -               |
| <b>R Temporal</b>  | 2.00            | 5.00            | 10.00           | <b>R Temporal</b>  | 1.35            | 3.86            | -               |
| <b>L Parietal</b>  | 2.00            | 5.00            | 10.00           | <b>L Parietal</b>  | 1.91            | 7.36            | -               |
| <b>R Parietal</b>  | 2.00            | 5.00            | 10.00           | <b>R Parietal</b>  | 1.98            | 7.09            | -               |
| <b>L Occipital</b> | 2.00            | 5.00            | 10.00           | <b>L Occipital</b> | 2.22            | 10.32           | -               |
| <b>R Occipital</b> | 2.00            | 5.00            | 10.00           | <b>R Occipital</b> | 1.25            | 3.72            | 15.79           |
| <b>L Frontal</b>   | 2.00            | 5.00            | 10.00           | <b>L Frontal</b>   | 1.90            | 6.19            | -               |
| <b>R Frontal</b>   | 2.00            | 5.00            | 10.00           | <b>R Frontal</b>   | 1.41            | 4.07            | -               |

**Supplementary Table S6.** Z-score values for used to anchor each ROI for the original (left) and data-driven replication runs of the SuStaIn model
